# Supplementary material for: Federated learning enabled privacy-preserving data access for predicting 30-day mortality in acute myocardial infarction
Source: Research Square preprint supplement (doi:10.21203/rs.3.rs-7454748/v1), 2025-09-22
Supplement: Supplementary file 1 [file 9c9e3c3ddfeaeb91fe3694fe.docx]

**SUPPLEMENTAL MATERIAL**

1. **Supplemental Methods**
2. **Supplemental Tables**

Table S1. Summary of predictors by region.

Table S2. Cross-validated AUROC for local, centralized, and federated logistic-regression models.

1. **Supplemental Figures**

Figure S1. AUROCs of local, centralized, and federated learning models using unregularized logistic regression.

Figure S2. AUROCs of local, centralized, and federated learning models using L2-regularized logistic regression.

Figure S3. AUROCs of local, centralized, and federated learning models using elastic net.

Figure S4. Calibration slopes of local, centralized, and federated learning models using unregularized logistic regression.

Figure S5. Calibration slopes of local, centralized, and federated learning models using L2-regularized logistic regression.

Figure S6. Calibration slopes of local, centralized, and federated learning models using elastic net.

Figure S7. Calibration intercepts of local, centralized, and federated learning models using unregularized logistic regression.

Figure S8. Calibration intercepts of local, centralized, and federated learning models using L2-regularized logistic regression.

Figure S9. Calibration intercepts of local, centralized, and federated learning models using elastic net.

1. **Supplemental Methods**
   1. ***Algorithms for data analysis***

Analyses were performed using the Python software (version 3.8.10). Additional details about the algorithms are available on GitHub: https://github.com/yutatennis/Fedrated-learning and https://github.com/kkmmmmm/Federated-learning.

1. **Supplemental Tables**

**Table S1. Summary of predictors by region**

Descriptive statistics for all candidate predictors across 16 regions. Continuous variables (age [years], height [cm], weight [kg], number of ECG leads [count]) are summarized as median (IQR). Ordinal variables (Killip class I–IV; smoking history: never/former/current) are summarized as median (IQR) or n (%), as appropriate. Binary variables (female sex; diabetes; hypotension [SBP <100 mmHg]; tachycardia [pulse >80 bpm]; anterior infarct location; previous MI; hypertension history; hypercholesterolemia; previous angina pectoris; family history of MI; time to relief of chest pain >1 h) are summarized as n (%). The first row reports 30-day mortality (n, %).

| Region number | 1 | 2 | 3 | 4 | 5 | 6 | 7 | 8 |
| --- | --- | --- | --- | --- | --- | --- | --- | --- |
| 30-day mortality | 135  (6.2) | 229  (7.8) | 166  (8.2) | 217  (7.5) | 133  (7.0) | 133  (8.4) | 211  (6.7) | 188  (6.4) |
| Predictors |  |  |  |  |  |  |  |  |
| Age (years) | 60.6  (50.9–69.9) | 63.3  (54.0–71.1) | 63.8  (54.9–71.1) | 61.3  (52.0–69.9) | 61.1  (51.4–69.0) | 61.4  (52.5–68.6) | 60.5  (50.7–69.4) | 61.0  (51.4–69.3) |
| Height (cm) | 173  (165–180) | 170  (165–176) | 170  (165–175) | 170  (165–177) | 170  (164–175) | 170  (165–176) | 173  (165–180) | 170  (164–175) |
| Weight (kg) | 82  (71–92) | 75  (67–85) | 75  (66–82) | 77  (68–86) | 73  (65–82) | 76  (70–85) | 82  (71–92) | 75  (68–83) |
| Number of ECG leads  (count) | 3  (3–5) | 4  (3–6) | 4  (3–6) | 4  (3–5) | 4  (3–5) | 4  (3–5) | 3  (3–5) | 4  (3–6) |
| Killip Classification | 1  (1–1) | 1  (1–1) | 1  (1–1) | 1  (1–1) | 1  (1–1) | 1  (1–1) | 1  (1–1) | 1  (1–1) |
| Female sex | 544  (24.9) | 720  (24.4) | 477  (23.5) | 685  (23.8) | 311  (16.3) | 392  (24.7) | 918  (29.1) | 633  (21.7) |
| Diabetes | 312  (14.3) | 282  (9.6) | 202  (10.0) | 411  (14.3) | 211  (11.1) | 225  (14.2) | 521  (16.5) | 577  (19.8) |
| Hypotension  (SBP < 100 mmHg) | 211  (9.6) | 150  (5.1) | 179  (8.8) | 196  (6.8) | 99  (5.2) | 113  (7.1) | 314  (10.0) | 129  (4.4) |
| Tachycardia  (pulse > 80 bpm) | 730  (33.4) | 812  (27.5) | 624  (30.7) | 876  (30.5) | 566  (29.6) | 573  (36.2) | 1165  (37.0) | 1070  (36.7) |
| Anterior infarct location | 815  (37.2) | 1163  (39.4) | 802  (39.5) | 1141  (39.7) | 763  (40.0) | 621  (39.2) | 1115  (35.4) | 1382  (47.4) |
| Previous MI | 375  (17.1) | 500  (16.9) | 279  (13.7) | 485  (16.9) | 220  (11.5) | 262  (16.5) | 558  (17.7) | 494  (16.9) |
| Hypertension history | 883  (40.4) | 1073  (36.3) | 580  (28.6) | 951  (33.1) | 667  (34.9) | 635  (40.1) | 1369  (43.5) | 972  (33.3) |
| Hypercholesterolemia | 886  (40.5) | 1016  (34.4) | 651  (32.1) | 828  (28.8) | 722  (37.8) | 653  (41.2) | 1152  (36.6) | 671  (23.0) |
| Previous angina pectoris | 745  (34.0) | 1205  (40.8) | 770  (37.9) | 1102  (38.3) | 667  (34.9) | 836  (52.7) | 1178  (37.4) | 1053  (36.1) |
| Family history of MI | 1041  (47.6) | 1171  (39.7) | 605  (29.8) | 1313  (45.7) | 464  (24.3) | 396  (25.0) | 1671  (53.0) | 819  (28.1) |
| Time to relief of  chest pain > 1 h | 1332  (60.9) | 1560  (52.8) | 1312  (64.6) | 1890  (65.7) | 1221  (64.0) | 869  (54.8) | 2188  (69.5) | 1950  (66.9) |
| Smoking history |  |  |  |  |  |  |  |  |
| Never smoker | 903  (41.3) | 987  (33.4) | 840  (41.4) | 1244  (43.3) | 851  (44.6) | 789  (49.8) | 1434  (45.5) | 1218  (41.8) |
| Former smoker | 674  (30.8) | 1089  (36.9) | 480  (23.6) | 876  (30.5) | 496  (26.0) | 389  (24.5) | 787  (25.0) | 588  (20.2) |
| Current smoker | 611  (27.9) | 876  (29.7) | 710  (35.0) | 756  (26.3) | 562  (29.4) | 407  (25.7) | 929  (29.5) | 1110  (38.1) |

ECG, electrocardiogram; SBP, systolic blood pressure; MI, myocardial infarction.

Data are expressed as the median (interquartile range) or n (%).

**Table S1. Summary of predictors by region (continued)**

| Region number | 9 | 10 | 11 | 12 | 13 | 14 | 15 | 16 |
| --- | --- | --- | --- | --- | --- | --- | --- | --- |
| 30-day mortality | 224  (7.2) | 95  (5.5) | 191  (7.7) | 294  (6.8) | 121  (5.3) | 260  (7.6) | 155  (6.0) | 99  (8.0) |
| Predictors |  |  |  |  |  |  |  |  |
| Age (years) | 61.2  (52.3–69.6) | 58.9  (49.9–67.8) | 61.8  (51.8–70.7) | 61.6  (51.9–70.2) | 62.3  (53.8–69.6) | 61.4  (52.1–69.9) | 61.2  (51.8–69.9) | 62.7  (54.3–70.3) |
| Height (cm) | 173  (165–180) | 173  (165–180) | 173  (165–180) | 172  (165–178) | 173  (168–178) | 173  (165–180) | 173  (165–180) | 170  (164–174) |
| Weight (kg) | 80  (70–91) | 81  (71–92) | 82  (72–92) | 80  (70–90) | 78  (70–85) | 80  (70–91) | 80  (70–91) | 75  (67–82) |
| Number of ECG leads  (count) | 3  (3–5) | 3  (3–6) | 4  (3–5) | 4  (3–5) | 4  (3–5) | 4  (3–6) | 4  (3–5) | 4  (3–6) |
| Killip Classification | 1  (1–1) | 1  (1–1) | 1  (1–1) | 1  (1–1) | 1  (1–1) | 1  (1–1) | 1  (1–1) | 1  (1–2) |
| Female sex | 894  (28.6) | 457  (26.6) | 697  (28.0) | 1197  (27.5) | 500  (21.8) | 942  (27.4) | 622  (24.1) | 289  (23.5) |
| Diabetes | 561  (18.0) | 290  (16.9) | 405  (16.3) | 783  (18.0) | 174  (7.6) | 574  (16.7) | 382  (14.8) | 95  (7.7) |
| Hypotension  (SBP < 100 mmHg) | 338  (10.8) | 164  (9.6) | 283  (11.4) | 432  (9.9) | 139  (6.1) | 351  (10.2) | 239  (9.3) | 41  (3.3) |
| Tachycardia  (pulse > 80 bpm) | 1104  (35.4) | 646  (37.6) | 847  (34.0) | 1423  (32.7) | 574  (25.0) | 1129  (32.8) | 853  (33.1) | 402  (32.7) |
| Anterior infarct location | 1171  (37.5) | 634  (36.9) | 894  (35.9) | 1683  (38.7) | 910  (39.6) | 1313  (38.2) | 963  (37.4) | 530  (43.1) |
| Previous MI | 549  (17.6) | 320  (18.6) | 433  (17.4) | 714  (16.4) | 341  (14.8) | 544  (15.8) | 477  (18.5) | 175  (14.2) |
| Hypertension history | 1372  (43.9) | 778  (45.3) | 1063  (42.7) | 1857  (42.7) | 517  (22.5) | 1473  (42.9) | 1036  (40.2) | 294  (23.9) |
| Hypercholesterolemia | 1221  (39.1) | 590  (34.4) | 997  (40.0) | 1684  (38.7) | 458  (19.9) | 1347  (39.2) | 938  (36.4) | 162  (13.2) |
| Previous angina pectoris | 1097  (35.1) | 631  (36.8) | 970  (38.9) | 1481  (34.0) | 958  (41.7) | 1171  (34.1) | 880  (34.2) | 343  (27.9) |
| Family history of MI | 1508  (48.3) | 895  (52.1) | 1178  (47.3) | 2148  (49.4) | 833  (36.3) | 1611  (46.9) | 1258  (48.8) | 418  (34.0) |
| Time to relief of  chest pain > 1 h | 2110  (67.6) | 1099  (64.0) | 1612  (64.7) | 3037  (69.8) | 1845  (80.3) | 2208  (64.2) | 1664  (64.6) | 597  (48.5) |
| Smoking history |  |  |  |  |  |  |  |  |
| Never smoker | 1333  (42.7) | 849  (49.4) | 1034  (41.5) | 1771  (40.7) | 1168  (50.8) | 1516  (44.1) | 1060  (41.1) | 546  (44.4) |
| Former smoker | 911  (29.2) | 428  (24.9) | 749  (30.1) | 1238  (28.4) | 489  (21.3) | 959  (27.9) | 703  (27.3) | 354  (28.8) |
| Current smoker | 879  (28.1) | 440  (25.6) | 708  (28.4) | 1343  (30.9) | 640  (27.9) | 962  (28.0) | 813  (31.6) | 331  (26.9) |

ECG, electrocardiogram; SBP, systolic blood pressure; MI, myocardial infarction.

Data are expressed as the median (interquartile range) or n (%).

**Table S2. Cross-validated AUROC for local, centralized, and federated logistic regression models**

Mean (SD) AUROC across stratified 5-fold cross-validation within each region. For each penalty (none, L2 [ridge], elastic net), columns report Local, Centralized (global), and Federated (global) models. Local models were trained and validated within their development region; centralized and federated models were trained on the full dataset and evaluated on the same held-out folds for comparability. Federated learning used Federated Averaging (FedAvg) with all 16 regions participating each round. Higher AUROC indicates better discrimination.

|  | Without regularization | | |  | L2 regularization | | |  | Elastic Net | | |
| --- | --- | --- | --- | --- | --- | --- | --- | --- | --- | --- | --- |
|  | Local | Centralized | FL |  | Local | Centralized | FL |  | Local | Centralized | FL |
| Region 1,　n=2188 | 0.846  (0.048) | 0.847  (0.044) | 0.847  (0.044) |  | 0.846  (0.048) | 0.847  (0.044) | 0.846  (0.043) |  | 0.846  (0.049) | 0.847  (0.044) | 0.847  (0.043) |
| Region 2, n=2952 | 0.812  (0.043) | 0.817  (0.043) | 0.817  (0.043) |  | 0.813  (0.042) | 0.817  (0.043) | 0.817  (0.042) |  | 0.812  (0.044) | 0.817  (0.043) | 0.817  (0.043) |
| Region 3, n=2030 | 0.812  (0.037) | 0.828  (0.041) | 0.828  (0.04) |  | 0.813  (0.037) | 0.828  (0.041) | 0.828  (0.041) |  | 0.813  (0.038) | 0.828  (0.041) | 0.828  (0.041) |
| Region 4, n=2876 | 0.833  (0.022) | 0.837  (0.023) | 0.837  (0.023) |  | 0.832  (0.023) | 0.837  (0.023) | 0.836  (0.023) |  | 0.832  (0.023) | 0.837  (0.023) | 0.836  (0.023) |
| Region 5, n=1909 | 0.819  (0.03) | 0.823  (0.035) | 0.823  (0.035) |  | 0.815  (0.031) | 0.823  (0.035) | 0.822  (0.035) |  | 0.822  (0.034) | 0.823  (0.035) | 0.824  (0.036) |
| Region 6, n=1585 | 0.776  (0.05) | 0.790  (0.032) | 0.790  (0.032) |  | 0.778  (0.049) | 0.790  (0.032) | 0.790  (0.031) |  | 0.776  (0.047) | 0.790  (0.032) | 0.791  (0.032) |
| Region 7, n=3150 | 0.808  (0.039) | 0.815  (0.027) | 0.814  (0.027) |  | 0.808  (0.038) | 0.815  (0.027) | 0.815  (0.027) |  | 0.808  (0.036) | 0.815  (0.027) | 0.814  (0.027) |
| Region 8, n=2916 | 0.826  (0.041) | 0.834  (0.047) | 0.834  (0.047) |  | 0.827  (0.041) | 0.834  (0.047) | 0.834  (0.047) |  | 0.827  (0.04) | 0.834  (0.047) | 0.834  (0.047) |
| Region 9, n=3123 | 0.829  (0.02) | 0.830  (0.022) | 0.830  (0.022) |  | 0.829  (0.02) | 0.830  (0.022) | 0.829  (0.022) |  | 0.830  (0.019) | 0.830  (0.022) | 0.830  (0.022) |
| Region 10, n=1717 | 0.811  (0.049) | 0.809  (0.032) | 0.809  (0.03) |  | 0.814  (0.05) | 0.809  (0.032) | 0.810  (0.032) |  | 0.815  (0.049) | 0.809  (0.032) | 0.810  (0.032) |
| Region 11, n=2491 | 0.830  (0.033) | 0.833  (0.038) | 0.833  (0.037) |  | 0.831  (0.034) | 0.833  (0.038) | 0.832  (0.037) |  | 0.832  (0.034) | 0.833  (0.038) | 0.831  (0.037) |
| Region 12, n=4352 | 0.826  (0.035) | 0.831  (0.032) | 0.830  (0.032) |  | 0.826  (0.035) | 0.831  (0.032) | 0.830  (0.032) |  | 0.826  (0.035) | 0.831  (0.032) | 0.830  (0.032) |
| Region 13, n=2297 | 0.820  (0.066) | 0.836  (0.047) | 0.835  (0.047) |  | 0.823  (0.064) | 0.836  (0.047) | 0.836  (0.047) |  | 0.823  (0.064) | 0.836  (0.047) | 0.836  (0.048) |
| Region 14, n=3437 | 0.808  (0.041) | 0.817  (0.046) | 0.817  (0.046) |  | 0.809  (0.041) | 0.817  (0.046) | 0.817  (0.045) |  | 0.809  (0.041) | 0.818  (0.046) | 0.817  (0.046) |
| Region 15, n=2576 | 0.786  (0.036) | 0.803  (0.036) | 0.803  (0.035) |  | 0.786  (0.034) | 0.803  (0.036) | 0.803  (0.035) |  | 0.785  (0.036) | 0.803  (0.036) | 0.802  (0.036) |
| Region 16, n=1231 | 0.733  (0.071) | 0.779  (0.085) | 0.779  (0.086) |  | 0.747  (0.078) | 0.779  (0.085) | 0.779  (0.086) |  | 0.741  (0.079) | 0.779  (0.085) | 0.779  (0.085) |

AUROC: area under the receiver operating characteristic curve; Local: model trained on its own development region; Centralized: model trained on pooled data; FL: federated learning. Data are presented as the mean (standard deviation) of the AUROC for the test data after stratified 5-fold cross-validation.

**Figure S1. AUROCs of local, centralized, and federated learning models using unregularized logistic regression.**

AUROC: area under the receiver operating characteristic curve; Centralized: model trained on pooled data minus the validation region; FL: federated learning. Point estimates and 95% confidence intervals of AUROCs for region-specific, centralized, and FL models developed using unregularized logistic regression are presented by validation region. Confidence intervals were calculated based on 1000 bootstrap iterations.

**Figure S2. AUROCs of local, centralized, and federated learning models using L2-regularized logistic regression.**

AUROC: area under the receiver operating characteristic curve; Centralized: model trained on pooled data minus the validation region; FL: federated learning. Point estimates and 95% confidence intervals of AUROCs for region-specific, centralized, and FL models developed using L2-regularized logistic regression are presented by validation region. Confidence intervals were calculated based on 1000 bootstrap iterations.

**Figure S3. AUROCs of local, centralized, and federated learning models using elastic net.**

AUROC: area under the receiver operating characteristic curve; Centralized: model trained on pooled data minus the validation region; FL: federated learning. Point estimates and 95% confidence intervals of AUROCs for region-specific, centralized, and FL models developed using elastic net are presented by validation region. Confidence intervals were calculated based on 1000 bootstrap iterations.

**Figure S4. Calibration slopes of** **local, centralized, and federated learning models using unregularized logistic regression.**

Centralized: model trained on pooled data minus the validation region; FL: federated learning. Point estimates and 95% confidence intervals of calibration slopes for region-specific, centralized, and federated learning models developed using unregularized logistic regression are presented by validation region. Confidence intervals were calculated based on 1000 bootstrap iterations.

**Figure S5. Calibration slopes of local, centralized, and federated learning models using L2-regularized logistic regression.**

Centralized: model trained on pooled data minus the validation region; FL: federated learning. Point estimates and 95% confidence intervals of calibration intercepts for region-specific, centralized, and federated learning models developed using L2-regularized logistic regression are presented by validation region. Confidence intervals were calculated based on 1000 bootstrap iterations.

**Figure S6. Calibration slopes of local, centralized, and federated learning models using elastic net.**

Centralized: model trained on pooled data minus the validation region; FL: federated learning. Point estimates and 95% confidence intervals of calibration intercepts for region-specific, centralized, and federated learning models developed using elastic net are presented by validation region. Confidence intervals were calculated based on 1000 bootstrap iterations.

**Figure S7. Calibration intercepts of local, centralized, and federated learning models using unregularized logistic regression.**

Centralized: model trained on pooled data minus the validation region; FL: federated learning. Point estimates and 95% confidence intervals of calibration intercepts for region-specific, centralized, and federated learning models developed using unregularized logistic regression are presented by validation region. Confidence intervals were calculated based on 1000 bootstrap iterations.

**Figure S8. Calibration intercepts of local, centralized, and federated learning models using L2-regularized logistic regression.**

Centralized: model trained on pooled data minus the validation region; FL: federated learning. Point estimates and 95% confidence intervals of calibration intercepts for region-specific, centralized, and federated learning models developed using L2-regularized logistic regression are presented by validation region. Confidence intervals were calculated based on 1000 bootstrap iterations.

**Figure S9. Calibration intercepts of local, centralized, and federated learning models using elastic net.**

Centralized: model trained on pooled data minus the validation region; FL: federated learning. Point estimates and 95% confidence intervals of calibration intercepts for region-specific, centralized, and federated learning models developed using elastic net are presented by validation region. Confidence intervals were calculated based on 1000 bootstrap iterations.
